# Supplementary material
Source: publisher site journal article supplement (https://www.degruyter.com/publication/journal_key/MATH/downloadAsset/MATH_CFP_Convex_Analysis_and_Applications.pdf)
Supplement: Supplementary file 1 [file MATH_CFP_Convex_Analysis_and_Applications.pdf]

# CONVEX ANALYSIS AND APPLICATIONS

Special Issue in Open Mathematics

## GUEST EDITOR

**Bessem Samet**, King Saud University, Riyadh, Saudi Arabia; e-mail: [bsamet@ksu.edu.sa](mailto:bsamet@ksu.edu.sa)

## DESCRIPTION

**Convex analysis** is a special branch of mathematics aiming to investigate the properties of convex sets and functions, which are essential in various mathematical disciplines such as optimization, control theory, operations research, geometry, differential equations, functional analysis etc. Convexity has several applications in various areas. For instance, numerous applications in engineering and science use convex optimization, a subfield of optimization that studies the minimization of convex functions over convex sets.

**The goal of this special issue in the journal [Open Mathematics](#)** is to collect original research articles focusing on the theory and applications of convexity.

Contributions to the Special Issue may address (but are not limited) to the following aspects:

- Generalized convexity
- Convex optimization
- Characterizations of convex functions
- Inequalities involving convex functions
- Geometric inequalities
- Convex metric spaces
- Algorithms and applications
- Numerical integration of convex functions
- Abstract convex spaces
- Variational inequalities

Authors are requested to submit their full revised papers complying the general scope of the journal. The submitted papers will undergo the standard peer-review process before they can be accepted. Notification of acceptance will be communicated as we progress with the review process.

## HOW TO SUBMIT

---

Before submission authors should carefully read the [Instruction for Authors](#).

Manuscripts can be written in TeX, LaTeX (the journal's [LATEX template](#) is recommended, but not obligatory). Please note that we do not accept papers in Plain TEX format. Text files can be also submitted as standard DOCUMENT (.DOC) which is acceptable if the submission in LATEX is not possible. **For an initial submission, the authors are strongly advised to upload their entire manuscript, including tables and figures, as a single PDF file.**

All submissions to the Special Issue must be made electronically via **online submission system Editorial Manager**: [www.editorialmanager.com/openmath](http://www.editorialmanager.com/openmath).

All manuscripts will undergo the standard peer-review process (single blind, at least two independent reviewers). When entering the submission via online submission system authors should choose the option/category "*Special Issue on Convex Analysis and Applications*".

Submission of a manuscript implies that the work described has not been published before and it is not under consideration for publication anywhere else.

**The deadline for submissions is March 31, 2024**, but individual papers will be reviewed and published online on an ongoing basis.

Contributors to the Special Issue will benefit from:

- **fair and constructive peer review**
- **quick online publication** of accepted papers (continuous publication model)
- language correction services for authors from non-English speaking regions
- no limitations on colour figures and word count in published articles
- all articles are freely available to the academic community worldwide without any restrictions
- promotion of published papers to readers and citers
- distribution to open access directories (such as DOAJ) and thousands of libraries worldwide
- **liberal policies on copyrights** (authors retain copyright) and on self-archiving (no embargo periods) ([License to Publish](#) (CC-BY))
- secure archiving by De Gruyter and the independent archiving service [Portico](#)

We are looking forward to your submission!

In case of any questions please contact **Prof. Bessem Samet**, [bsamet@ksu.edu.sa](mailto:bsamet@ksu.edu.sa) or **Dr. Justyna Żuk** (Managing Editor of Open Mathematics), [Justyna.Zuk@degruyter.com](mailto:Justyna.Zuk@degruyter.com).
